# Supplementary material
Source: Springer Nature journal article supplement (https://www.springermedizin.de/resource/supplementary/12968_2010_1443_MOESM4_ESM.pdf/9580146)

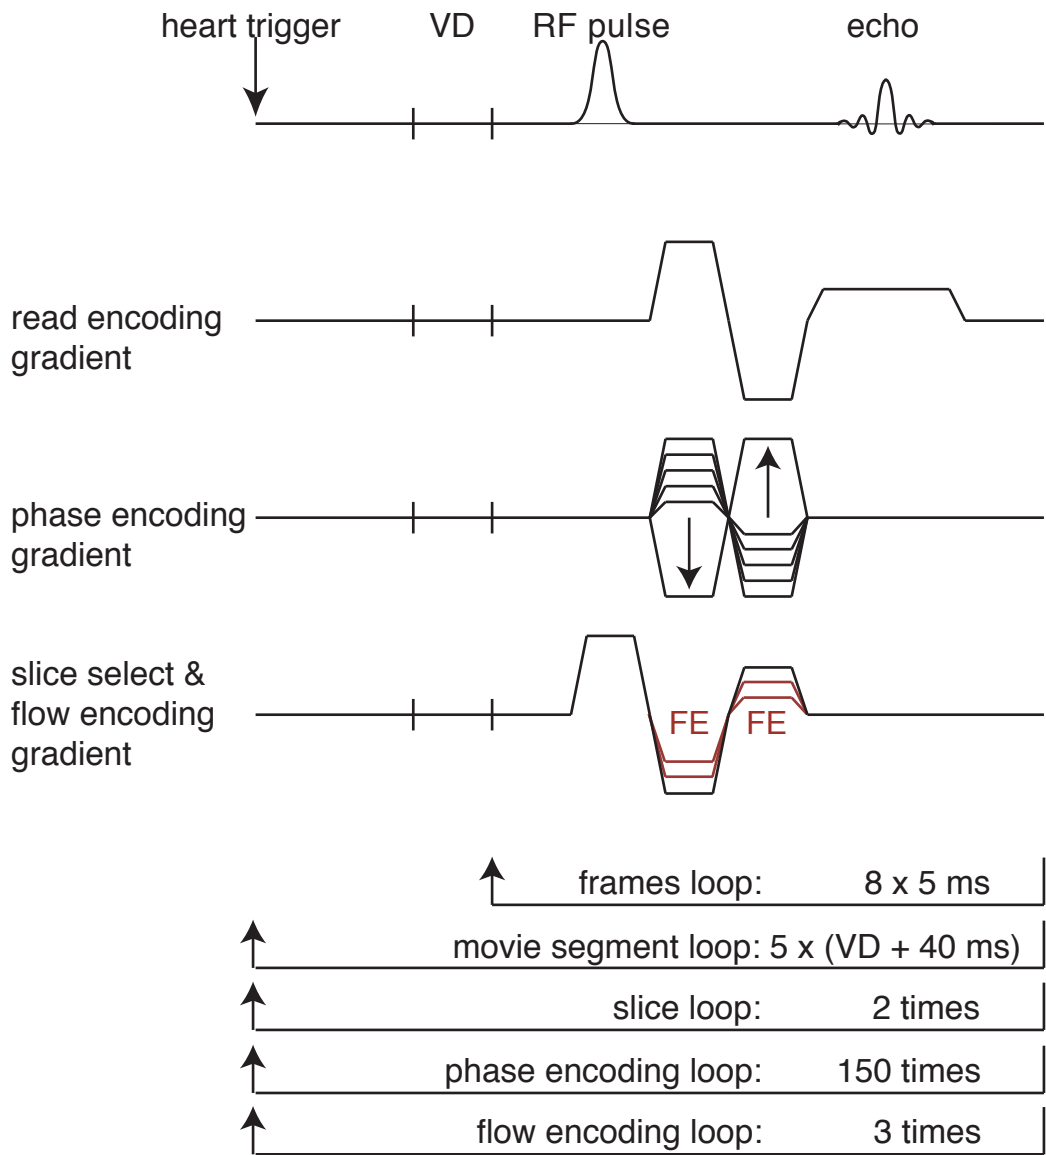

FE = flow encoding

VD = {0ms; 1ms; 2ms; 3ms; 4ms}; VD incremented after each call

Supplement: MOESM4 [file 9580146]
